# Supplementary material for: The prediction of survival in Gastric Cancer based on a Robust 13-Gene Signature
Source: PubMed Central journal article supplement (PMC8100809; doi:10.7150/jca.49658), 2021-04-12
Supplement: jcav12p3344s1.pdf [file jcav12p3344s1.pdf]

Table S1. Detailed clinic parameters for 884 patients

| Variables                   | GSE57303   | GSE15459     | GSE62254     | TCGA       |
|-----------------------------|------------|--------------|--------------|------------|
| Age                         |            |              |              |            |
| Mean(media)                 | 60.7(63)   | 64.4(66)     | 62.0(64)     | 65.2(67)   |
| IQR                         | 55-68      | 57-73        | 55-70        | 58-72      |
| Gender                      |            |              |              |            |
| Male                        | 52         | 116          | 198          | 216        |
| Female                      | 18         | 66           | 101          | 117        |
| Lauren subtype              |            |              |              |            |
| Diffuse                     | 35         | 73           | 124          | 58         |
| Intestinal                  | 20         | 91           | 140          | 70         |
| Mixed                       | 15         | 18           | 16           | 0          |
| NA                          | 0          | 0            | 19           | 205        |
| Stage                       |            |              |              |            |
| I                           | 1          | 31           | 30           | 44         |
| II                          | 12         | 28           | 95           | 107        |
| III                         | 45         | 66           | 95           | 136        |
| IV                          | 12         | 57           | 77           | 32         |
| NA                          | 0          | 0            | 2            | 14         |
| Overall survival            |            |              |              |            |
| Mean(media)                 | 975.9(900) | 1215.4(609)  | 1522.9(1742) | 640.4(486) |
| IQR                         | 397.5-1500 | 296.8-1909.8 | 542-2377     | 294-819    |
| Tumor site                  |            |              |              |            |
| Body                        | NA         | NA           | 107          | 80         |
| Antrum                      | NA         | NA           | 154          | 81         |
| Cardia                      | NA         | NA           | 32           | 120        |
| Fundus                      | NA         | NA           | 0            | 39         |
| Lesser curvature of stomach | NA         | NA           | 0            | 1          |
| Whole                       | NA         | NA           | 6            | 12         |
| IQR, interquartile range    |            |              |              |            |

Table S2. Detailed clinic parameters for 191 patients

| Variables                | TCGA       |
|--------------------------|------------|
| Age                      |            |
| Mean(media)              | 64.9(66)   |
| IQR                      | 58-72      |
| Gender                   |            |
| Male                     | 116        |
| Female                   | 75         |
| Lauren subtype           |            |
| Diffuse                  | 31         |
| Intestinal               | 32         |
| NA                       | 128        |
| Stage                    |            |
| I                        | 30         |
| II                       | 75         |
| III                      | 73         |
| IV                       | 12         |
| NA                       | 1          |
| Tumor site               |            |
| Body                     | 44         |
| Antrum                   | 64         |
| Cardia                   | 45         |
| Fundus                   | 31         |
| NA                       | 7          |
| Recurrence-free survival |            |
| Mean(media)              | 553.0(451) |
| IQR                      | 281-737.5  |
| IQR, interquartile range |            |
